# Supplementary material
Source: PubMed Central journal article supplement (PMC4455346)
Supplement: ajtr0007-0710-f5.pdf [file ajtr0007-0710-f5.pdf]

# CDCA5 overexpression in urothelial carcinoma

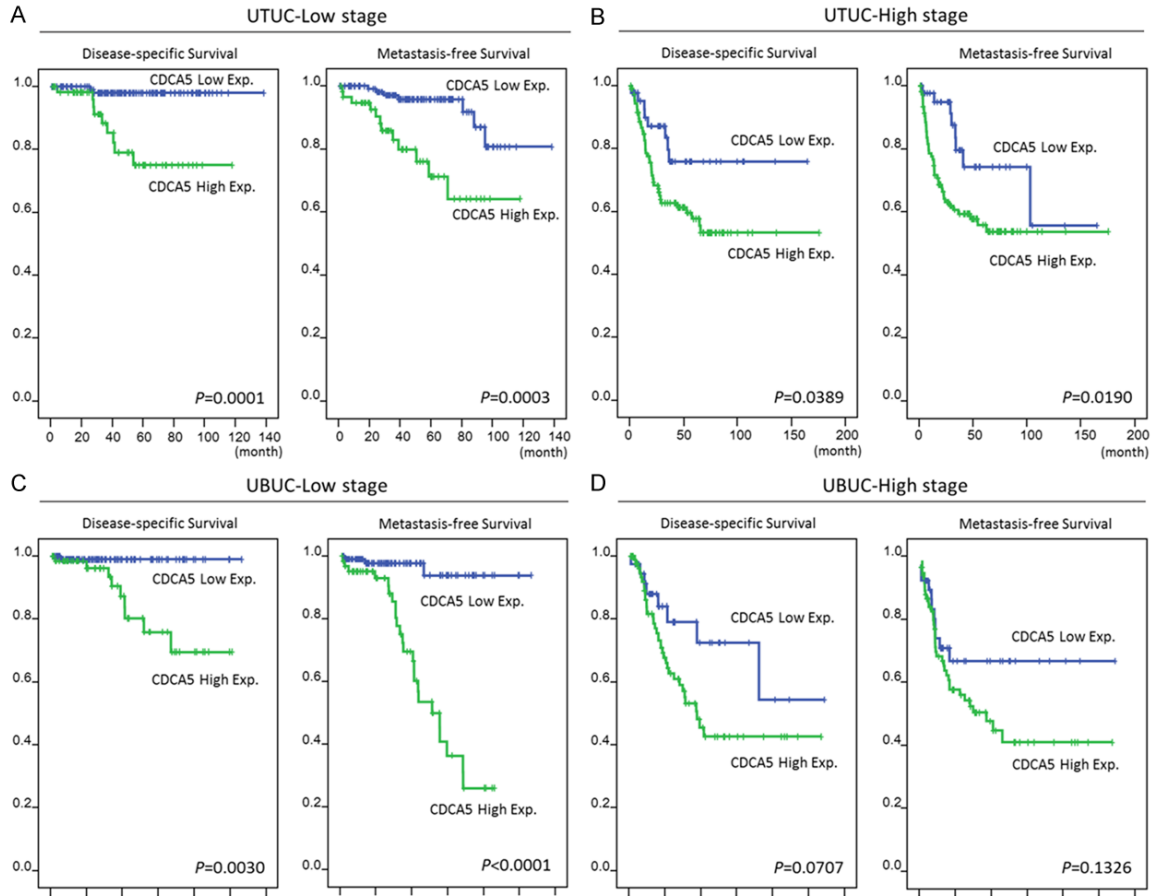

**Figure S1.** Kaplan-Meier plots reveal that CDCA5 over-expression is associated with poor disease-specific survival (DSS) and metastasis-free survival (MeFS) in the four groups: upper tract urothelial carcinoma (UTUC) of low- and high-stage as well as urinary bladder urothelial carcinoma (UBUC) of low- and high-stage. Notably, in the groups of UTUC-Low stage, UTUC-High stage and UBUC-Low stage, CDCA5 over-expression predicts poor DSS and MeFS with statistical significance (all  $p < 0.05$ ).
